# Supplementary material
Source: Springer Nature journal article supplement (https://www.springermedizin.de/resource/supplementary/12943_2010_710_MOESM3_ESM.pdf/9554630)

**A****p63 controls cell proliferation**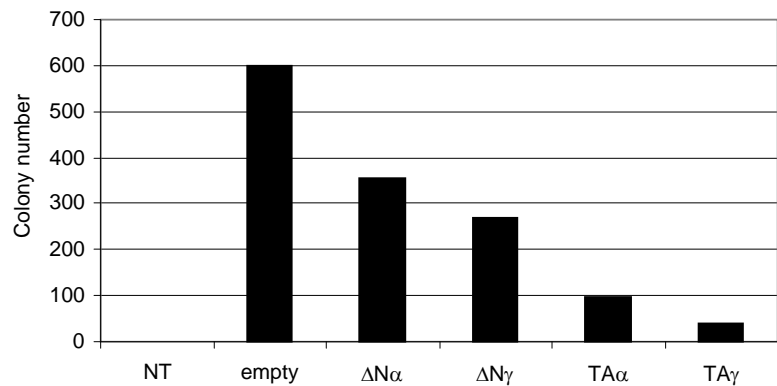**B**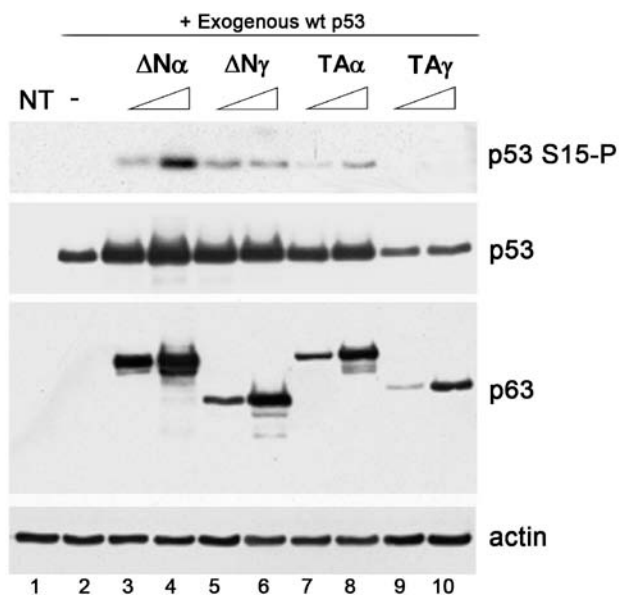**C**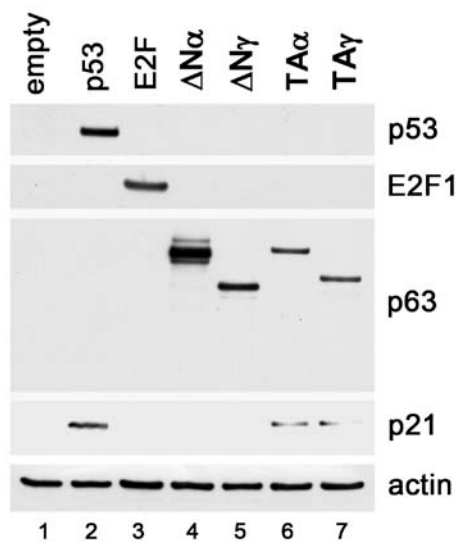

Supplement: MOESM3 [file 9554630]
